# Supplementary material
Source: PubMed Central journal article supplement (PMC3031534)
Supplement: NIHMS254947-supplement-Supp_Data.pdf [file NIHMS254947-supplement-Supp_Data.pdf]

# CHEMBIOCHEM

## Supporting Information

© Copyright Wiley-VCH Verlag GmbH & Co. KGaA, 69451 Weinheim, 2010

### **FACS-Based Selection of Tandem Tetracysteine Peptides with Improved ReAsH Brightness in Live Cells**

Schuyler B. Van Engelenburg, Theresa Nahreini, and Amy E. Palmer\*<sup>[a]</sup>

cbic\_200900689\_sm\_miscellaneous\_information.pdf

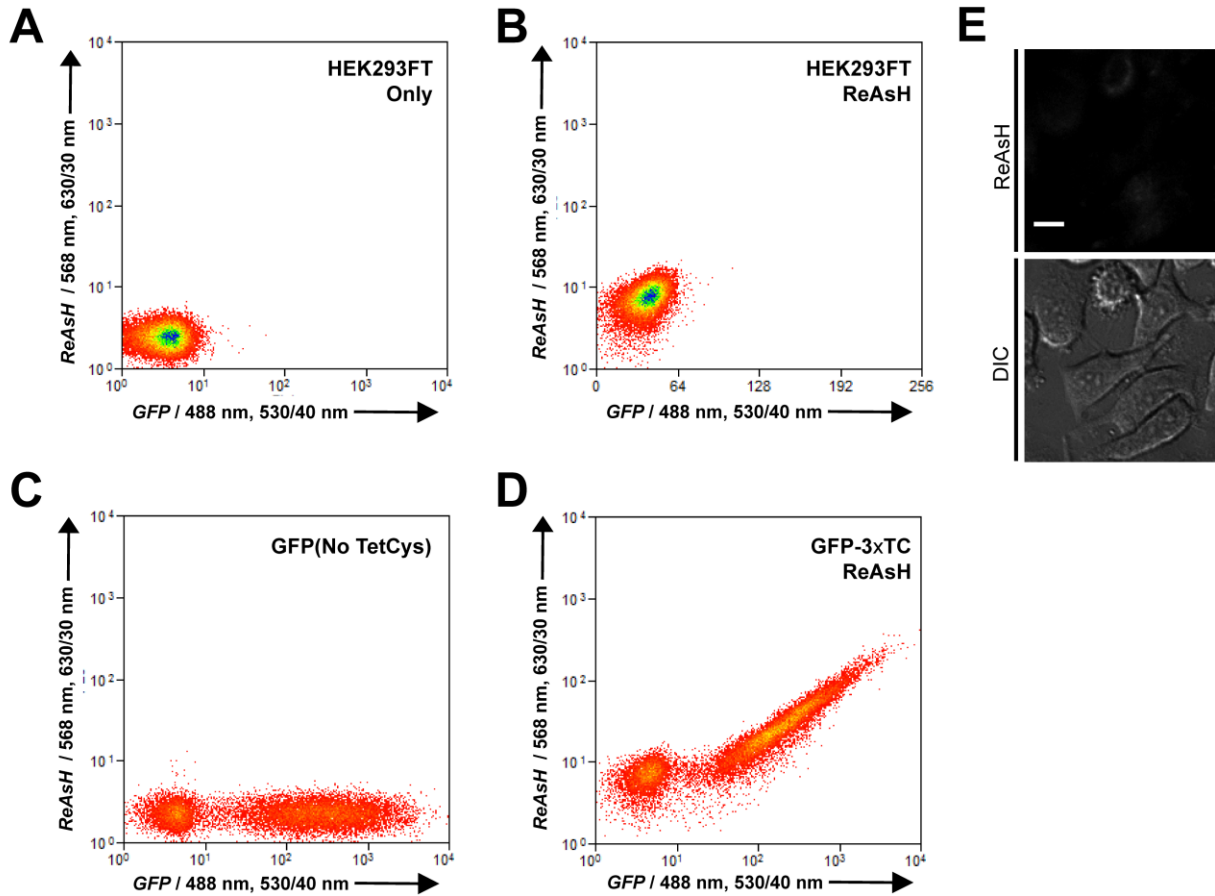

**Supplementary Figure 1.** Control experiments demonstrate specificity for ReAsH binding to the GFP-3×TC. FACS quantification of fluorescence levels for: (a) HEK293FT cells only, (b) ReAsH stained and BAL destained HEK293FT cells not expressing GFP-3×TC, (c) HEK293FT cells expressing wild-type eGFP only, and (d) ReAsH stained and BAL destained HEK293FT cells expressing the rationally designed GFP-3×TC protein. Note the increased level of fluorescence ( $>10^1$ ) for specifically stained HEK293FT cells. (e) Microscopic analysis of ReAsH treated and BAL destained HEK293FT cells negative for GFP-3×TC. ReAsH Image is thresholded to same level as images from Figure 2. Typically,  $\leq 30\%$  of the fluorescence signal is attributed to background ReAsH staining which is corrected by subtraction in all experiments described. Scale bar represents 10  $\mu\text{m}$ .

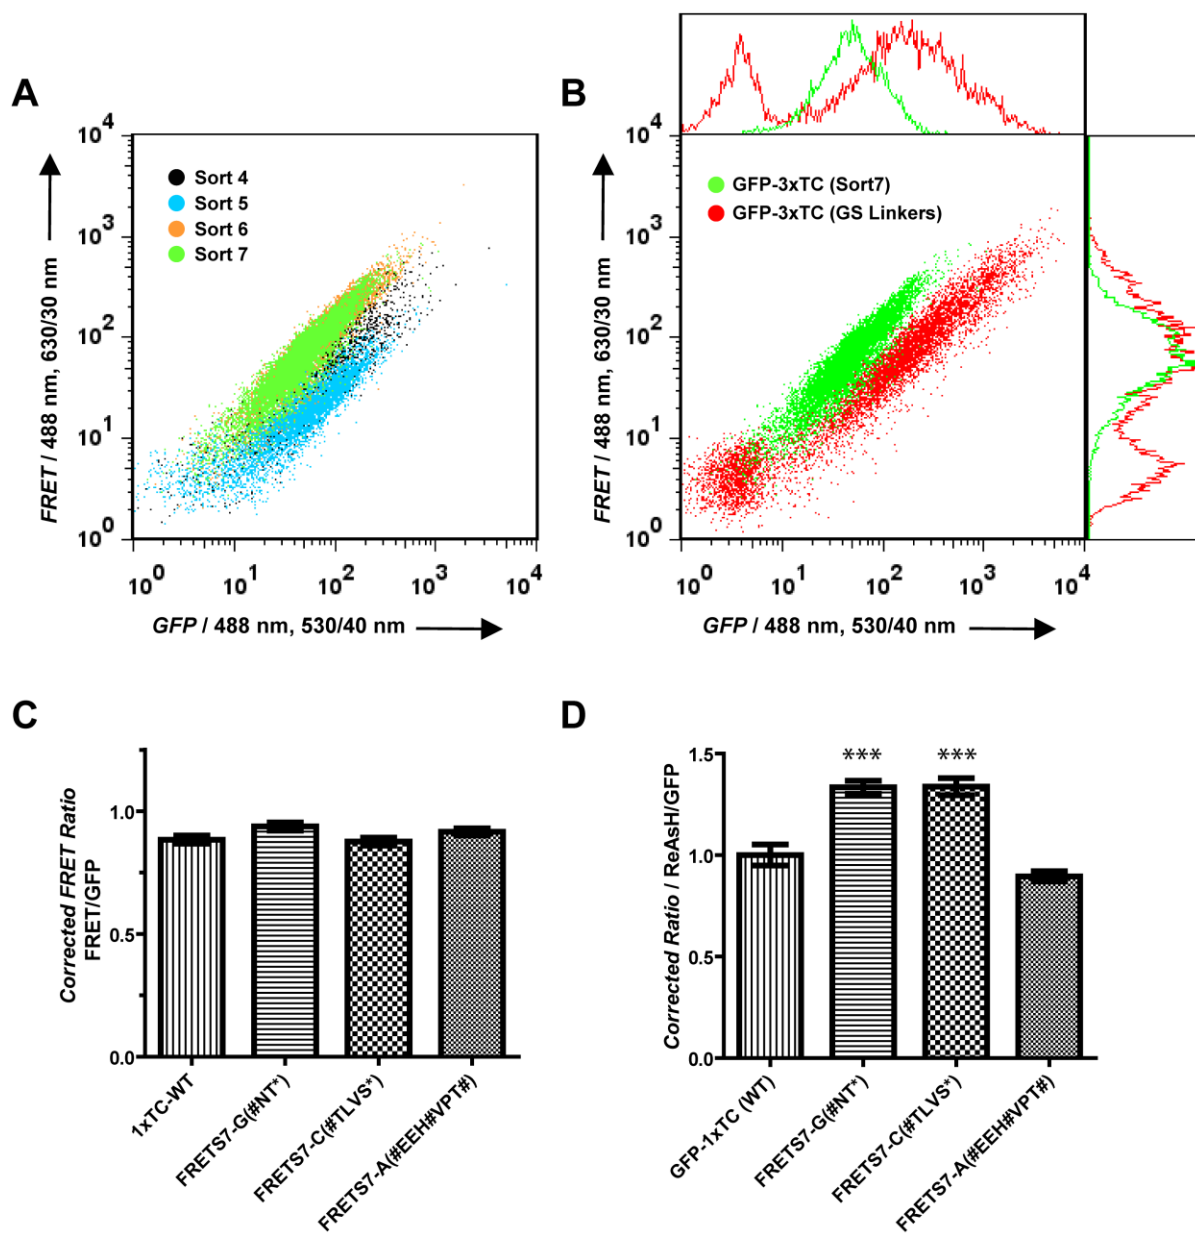

**Supplementary Figure 2.** FRET-based FACS and fluorescence microscopy analysis of the GFP-3xTC library reveals the core 1xTC motif is sufficient for maximal FRET/GFP ratio. (A) Enrichment of GFP-TC clones with improved FRET properties. Sorts 4-7 were normalized to an isogenic HEK293FT cell line stably expressing a rationally designed GFP-3xTC (GS spacers) protein. Histograms represent  $n = 5.0 \times 10^3$  cell events. (B) FRET-based FACS analysis reveals GFP-TC variants with improved properties relative to the GFP-3xTC (GS spacer) peptide. However, only one GFP-3xTC clone (GFP-#EEH#VPT#) was isolated from the final sort. The remainder of the isolated clones contained stop codon mutations on or within the first randomized linker of the 3xTC motif yielding only one biarsenical binding site with short C-terminal amino acid extensions. (C) Single cell fluorescence microscopy shows no significant improvement in the FRET ratio (FRET/GFP) when compared to the single core TC motif alone

( $n \geq 60$  cells for each of three independent experiments). (D) Modest improvements ( $\leq 1.3$ -fold) in the ReAsH brightness (ReAsH intensity normalized to the GFP intensity) are observed for two truncated GFP-1 $\times$ TC variants compared with the core GFP-1 $\times$ TC peptide ( $n \geq 60$  cells for three independent experiments; \*\*\*  $P < 0.001$ ). The only GFP-3 $\times$ TC tag selected by this sorting strategy displayed no improvement in ReAsH fluorescence relative to GFP. Error bars represent SEM.

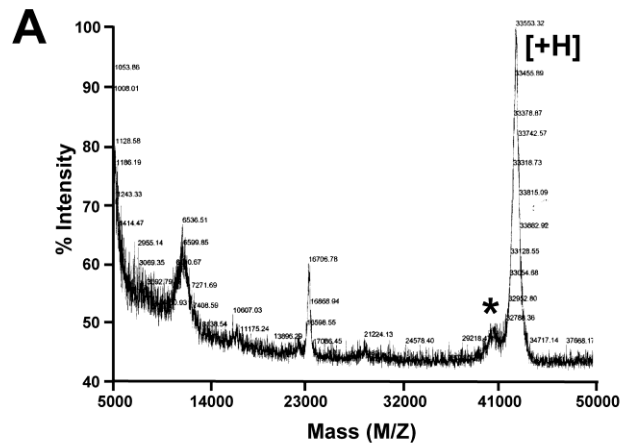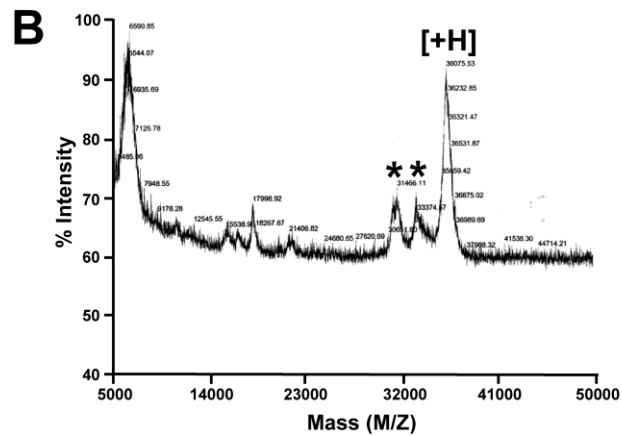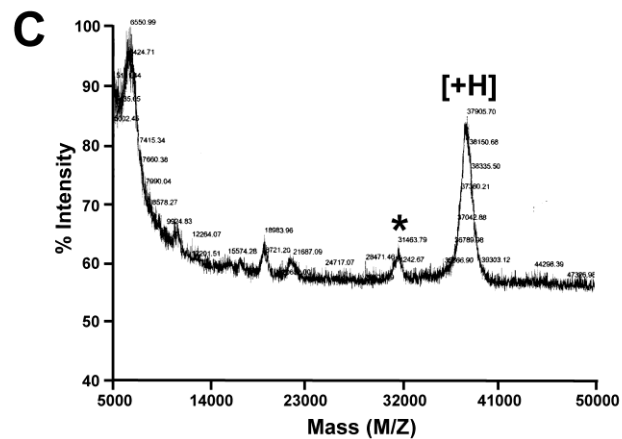

**Supplementary Figure 3.** MALDI-TOF mass spectra of ReAsH saturated GFP-Tetracysteine variants. Metal affinity chromatography purified GFP-TetCys constructs were subjected to 5-fold molar excess ReAsH (relative to the predicted number of binding sites) and desalted for mass spectrometry analysis. (a) GFP-1×TC (expected MW: 33.689 KDa; predicted MW: 33.553 KDa), (b) GFP-2×TC (expected MW: 37.489 KDa; predicted MW: 36.075 KDa), and (c) GFP-3×TC20 (expected MW: 38.160 KDa; predicted MW: 37.905 KDa) show appropriate +1

MALDI-TOF mass spectra and minimal proteolysis and/or cysteine oxidation. Asterisk (\*) denotes minimal potential proteolysis products and or oxidized GFP-TetCys protein unable to bind ReAsH.
